# Supplementary material
Source: Springer Nature journal article supplement (https://www.springermedizin.de/resource/supplementary/12979_2012_111_MOESM1_ESM.pdf/9603406)
Supplement: MOESM1 [file 9603406]

# Mini-Nutritional Assessment MNA™

Last Name: \_\_\_\_\_ First Name: \_\_\_\_\_ M.I.: \_\_\_\_\_ Sex: \_\_\_\_\_ Date: \_\_\_\_\_

Age: \_\_\_\_\_ Weight (kg): \_\_\_\_\_ Height (cm): \_\_\_\_\_ Knee Height (cm): \_\_\_\_\_

*Complete the form by writing the numbers in the boxes. Add the numbers in the boxes and compare the total assessment to the Malnutrition Indicator Score.*

### Anthropometric Assessment

| 1. Body Mass Index (BMI) (weight in kg/height in m) <sup>2</sup> | Points |
|------------------------------------------------------------------|--------|
| a. BMI <19 = 0 points                                            | □      |
| b. BMI to <21 = 1 point                                          | □      |
| c. BMI 21 to <23 = 2 points                                      | □      |
| d. BMI ≥ 23 = 3 points                                           | □      |
|                                                                  |        |
| 2. Mid-arm circumference (MAC) in cm                             | Points |
| a. MAC < 21 = 0.0 points                                         | □      |
| b. MAC 21 to < 22 = 0.5 points                                   | □      |
| c. MAC ≥ 22 = 1.0 points                                         | □      |
|                                                                  |        |
| 3. Calf circumference (CC) in cm                                 | Points |
| a. CC < 31 = 0 points    b. CC ≥ 31 = 1 point                    | □      |
|                                                                  |        |
| 4. Weight loss during last 3 months                              | Points |
| a. weight loss greater than 3 kg (6.6 lbs) = 0 points            | □      |
| b. does not know = 1 point                                       | □      |
| c. weight loss between 1 & 3 kg = 2 points                       | □      |
| d. no weight loss = 3 points                                     | □      |

### General Assessment

|                                                                            |        |
|----------------------------------------------------------------------------|--------|
| 5. Lives independently (not in a nursing home or hospital)                 | Points |
| a. no = 0 points    b. yes = 1 point                                       | □      |
| 6. Takes more than 3 prescription drugs per day                            | □      |
| a. yes = 0 points    b. no = 1 point                                       | □      |
| 7. Has suffered psychological stress or acute disease in the past 3 months | □      |
| a. yes = 0 points    b. no = 1 point                                       | □      |
| 8. Mobility                                                                | □      |
| a. bed or chair bound = 0 points                                           | □      |
| b. able to get out of bed/chair but does not go out = 1 point              | □      |
| c. goes out = 2 points                                                     | □      |
| 9. Neuropsychological problems                                             | □      |
| a. severe dementia or depression = 0 points                                | □      |
| b. mild dementia = 1 point                                                 | □      |
| c. no psychological problems = 2 points                                    | □      |
| 10. Pressure sores or skin ulcers                                          | □      |
| a. yes = 0 points    b. no = 1 point                                       | □      |

### Dietary Assessment

|                                                     |        |
|-----------------------------------------------------|--------|
| 11. How many full meals does the patient eat daily? | Points |
| a. 1 meal = 0 points                                | □      |
| b. 2 meals = 1 point                                | □      |
| c. 3 meals = 2 points                               | □      |

| 12. Selected consumption markers for protein intake                                                                                      | Point |
|------------------------------------------------------------------------------------------------------------------------------------------|-------|
| • At least one serving of dairy products (milk, cheese, yogurt) per day?    yes <input type="checkbox"/> no <input type="checkbox"/>     | □     |
| • Two or more servings of legumes or eggs per week?    yes <input type="checkbox"/> no <input type="checkbox"/>                          | □     |
| • Meat, fish, or poultry every day?    yes <input type="checkbox"/> no <input type="checkbox"/>                                          | □     |
| a. if 0 or 1 yes = 0.0 points                                                                                                            | □     |
| b. if 2 yes = 0.5 points                                                                                                                 | □     |
| c. if 3 yes = 1.0 points                                                                                                                 | □     |
| 13. Consumes two or more servings of fruits or vegetables per day?                                                                       | □     |
| a. no = 0 points    b. yes = 1 point                                                                                                     | □     |
| 14. Has food intake declined over the past three months due to loss of appetite, digestive problems, chewing or swallowing difficulties? | □     |
| a. severe loss of appetite = 0 points                                                                                                    | □     |
| b. moderate loss of appetite = 1 point                                                                                                   | □     |
| c. no loss of appetite = 2 points                                                                                                        | □     |
| 15. How much fluid (water, juice, coffee, tea, milk...) is consumed per day? (1 cup = 8 oz.)                                             | □     |
| a. less than 3 cups? = 0.0 points                                                                                                        | □     |
| b. 3 to 5 cups = 0.5 points                                                                                                              | □     |
| c. more than 5 cups = 1.0 points                                                                                                         | □     |
| 16. Mode of feeding                                                                                                                      | □     |
| a. unable to eat without assistance = 0 points                                                                                           | □     |
| b. self-fed with some difficulty = 1 point                                                                                               | □     |
| c. self-fed without any problem = 2 points                                                                                               | □     |

### Self-Assessment

|                                                                                                |        |
|------------------------------------------------------------------------------------------------|--------|
| 17. Do they view themself as having nutritional problems?                                      | Points |
| a. major malnutrition = 0 points                                                               | □      |
| b. does not know or moderate malnutrition = 1 point                                            | □      |
| c. no nutritional problem = 2 points                                                           | □      |
| 18. In comparison with other people of the same age, how do they consider their health status? | □      |
| a. not as good = 0.0 points                                                                    | □      |
| b. does not know = 0.5 points                                                                  | □      |
| c. as good = 1.0 points                                                                        | □      |
| d. better = 2.0 points                                                                         | □      |

**Assessment Total (max. 30 points)**    □ □ □

### Malnutrition Indicator Score

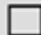

≥ 24 points well-nourished

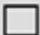

17 to 23.5 points at risk of malnutrition

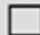

< 17 points malnourished
